# Supplementary material for: On the hydrogen bond nature of the C–H⋯F interactions in molecular crystals. An exhaustive investigation combining a crystallographic database search and ab initio theoretical calculations
Source: Royal Society of Chemistry journal article supplement (doi:10.1039/b717276c), 2008-01-01
Supplement: b717276c.pdf [file b717276c.pdf]

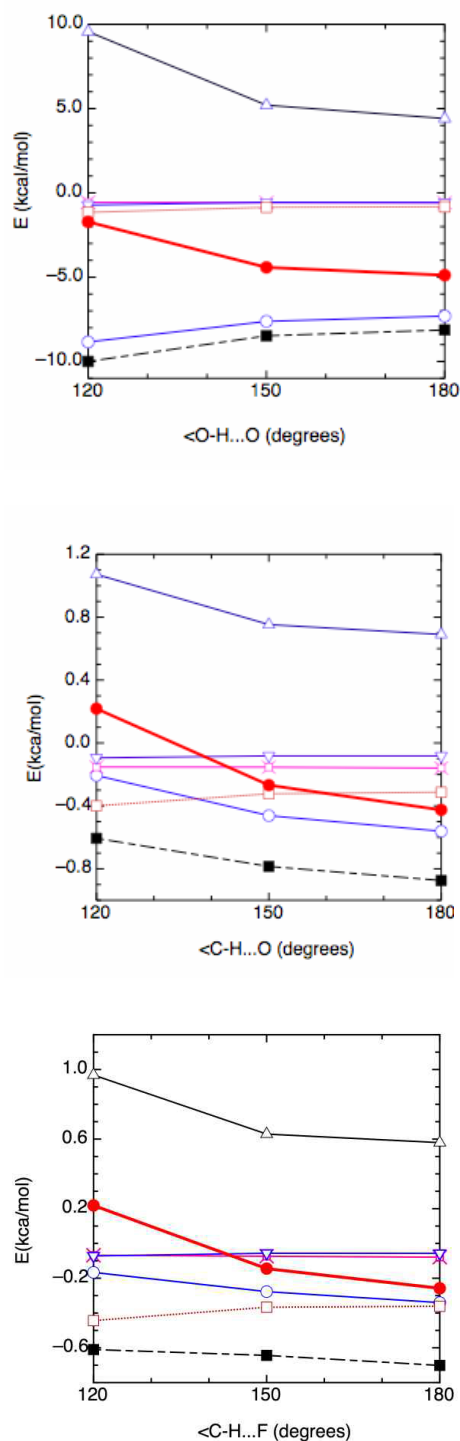

**Figure S1.** Variation of the interaction energy of the water dimer, methane-water and methane-fluoromethane complex and its components with the  $\langle\text{O-H}\cdots\text{O}$ ,  $\langle\text{C-H}\cdots\text{O}$  and  $\langle\text{C-H}\cdots\text{F}$  angles. The following symbols are used to indicate each IMPT component:  $\circ$  for the electrostatic,  $\Delta$  for the exchange-repulsion,  $\nabla$  for the polarization,  $\square$  for the dispersion one). The total interaction energy ( $\bullet$ , obtained by adding all components) and the sum of the electrostatic and dispersion components ( $\blacksquare$ ) are also given for comparison.
